# Supplementary material
Source: PubMed Central journal article supplement (PMC7581274)
Supplement: NIHMS1634315-supplement-Supplemental_tables_figures.pdf [file NIHMS1634315-supplement-Supplemental_tables_figures.pdf]

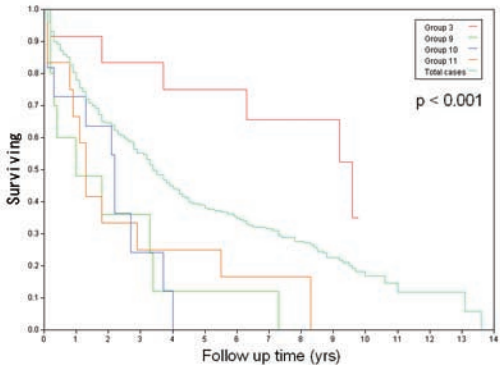

**LEGENDS FOR SUPPLEMENTAL TABLES AND FIGURES FOR:**

**Overexpression of Phospho-eIF4E Is Associated with Survival via AKT Pathway in Non-Small Cell Lung Cancer.**

Akihiko Yoshizawa<sup>1,2</sup> Junya Fukuoka,<sup>3</sup> Shigeki Shimizu,<sup>1,4</sup> Konstantin Shilo,<sup>5</sup> Teri J. Franks,<sup>5</sup> Stephen M. Hewitt,<sup>6</sup> Takeshi Fujii,<sup>7</sup> and Carlos Cordon-Cardo<sup>8</sup>, Jin Jen,<sup>9</sup> and William D. Travis<sup>1</sup>

- 1 Department of Pathology, Memorial Sloan-Kettering Cancer Center, New York, NY, United States;
- 2 Department of Diagnostic Pathology, Kyoto University Hospital, Kyoto, Japan;
- 3 Laboratory of Pathology, Toyama University Hospital, Toyama, Japan;
- 4 Department of Clinical Pathology (Pathology II) Nagoya City University Graduate School of Medical Sciences, Nagoya, Japan;
- 5 Department of Pulmonary & Mediastinal Pathology, AFIP, Washington, DC, United States;
- 6 Laboratory of Pathology, NCI, NIH, Bethesda, MD, United States;
- 7 Department of Pathology, Toranomon Hospital, Tokyo, Japan;
- 8 Department of Pathology, Columbia University, New York, NY, United States;
- 9 Department of Pulmonary and Critical Care Medicine, Mayo Clinic, Rochester, MN, United States;

**Corresponding author:**

William D. Travis, M.D.  
Dept of Pathology  
Memorial Sloan Kettering Cancer Center  
1275 York Ave  
New York, NY 10065, United States  
Tel: 212-639-3325; Fax: 212-717-3576  
travisw@mskcc.org

Supplemental Table 1: Clinical characteristics of all NSCLC patients in this study

Supplemental Table 2: Protein expressions and clinical variables

Abbrev. : \*: Fisher's exact test (the others were judged by Chi-square test)

\*\* : "Wel", "Mod", "Por" in Tumor Grade show well differentiated, moderately differentiated, and poorly differentiated, respectively.

Supplemental Table 3: Relationship of expression of six phosphoproteins.

Supplemental Table 4: Survival of Groups clustered by protein expression

Supplemental Figure 1: Kaplan Meier curve for Cluster Groups 3, 9, 10 and 11 showing significant survival differences.

| Variable                             | No. of patients | Category         | Available No. for survival analysis | Median survival (yrs) | log rank |     |
|--------------------------------------|-----------------|------------------|-------------------------------------|-----------------------|----------|-----|
| Sex                                  | 255             | Male             | 188                                 | 2.9                   | 0.018    |     |
|                                      |                 | Female           | 67                                  | 4.3                   |          |     |
| Age<br>64.5 +/- 9.1 (36-86)          | 247             | 60 and younger   | 78                                  | 3.1                   | 0.528    |     |
|                                      |                 | 61 and older     | 169                                 | 3.5                   |          |     |
| Histology                            | 252             | ADC              | 131                                 | 3.3                   | 0.556    |     |
|                                      |                 | SqCC             | 121                                 | 3.8                   |          |     |
| Grade                                | 168             | Well             | 23                                  | 3.2                   | 0.266    |     |
|                                      |                 | Moderate         | 69                                  | 2.7                   |          |     |
|                                      |                 | Poorly           | 76                                  | 2.9                   |          |     |
| Tumor size<br>3.3cm+/-2.4 (0.5-17.0) | 171             | 30mm and smaller | 99                                  | 3.8                   | 0.112    |     |
|                                      |                 | 31mm and larger  | 72                                  | 3.3                   |          |     |
| Stage                                | 212             | I                | 136                                 | 4.3                   | 0.025    |     |
|                                      |                 | II               | 36                                  | 3.9                   |          |     |
|                                      |                 | III              | 31                                  | 1.6                   |          |     |
|                                      |                 | IV               | 9                                   | 1.2                   |          |     |
| Vital status                         | 254             | Alive            | 62                                  |                       | <0.001   |     |
|                                      |                 | Dead:            | Tumor related                       | 49                    |          | 1.7 |
|                                      |                 |                  | Other cause                         | 20                    |          | 1.8 |
|                                      |                 |                  | Unknown                             | 123                   |          | 2.8 |

| antibody |      | Sex  |        | p value | Age  |     | p value | Tumor Grade** |     |     | p value | Tumor Size |      | p value | Stage |        | p value |
|----------|------|------|--------|---------|------|-----|---------|---------------|-----|-----|---------|------------|------|---------|-------|--------|---------|
|          |      | male | female |         | =<60 | >60 |         | Wel           | Mod | Por |         | =<3cm      | >3cm |         | I,II  | III,IV |         |
| p-AKT    | posi | 140  | 44     | 0.22    | 56   | 131 | 0.114   | 19            | 53  | 56  | 0.787   | 90         | 71   | 0.451   | 119   | 31     | 0.589   |
|          | nega | 26   | 13     |         | 19   | 26  |         | 5             | 10  | 14  |         | 22         | 13   |         | 30    | 6      |         |
| PTEN     | posi | 153  | 57     | 0.098*  | 73   | 145 | 0.587*  | 20            | 62  | 66  | 0.160*  | 106        | 77   | 0.407   | 136   | 36     | 0.964*  |
|          | nega | 13   | 1      |         | 4    | 11  |         | 3             | 3   | 2   |         | 6          | 7    |         | 11    | 3      |         |
| p-mTOR   | posi | 83   | 26     | 0.534   | 41   | 72  | 0.162   | 13            | 25  | 31  | 0.273   | 56         | 36   | 0.357   | 70    | 23     | 0.122   |
|          | nega | 90   | 34     |         | 36   | 93  |         | 10            | 42  | 41  |         | 61         | 51   |         | 85    | 16     |         |
| p-TSC2   | posi | 13   | 4      | 0.876*  | 8    | 9   | 0.183   | 2             | 9   | 3   | 0.158*  | 81         | 5    | 0.331   | 15    | 2      | 0.353*  |
|          | nega | 160  | 54     |         | 70   | 153 |         | 21            | 58  | 68  |         | 104        | 11   |         | 137   | 37     |         |
| p-S6     | posi | 54   | 12     | 0.101   | 18   | 47  | 0.332   | 7             | 17  | 23  | 0.723   | 38         | 20   | 0.147   | 48    | 8      | 0.244   |
|          | nega | 120  | 48     |         | 61   | 117 |         | 17            | 50  | 50  |         | 80         | 67   |         | 109   | 30     |         |
| p-eIF4E  | posi | 69   | 22     | 0.794   | 34   | 59  | 0.273   | 8             | 23  | 35  | 0.166   | 42         | 38   | 0.24    | 53    | 20     | 0.046   |
|          | nega | 107  | 37     |         | 45   | 106 |         | 17            | 43  | 37  |         | 76         | 49   |         | 103   | 19     |         |
| p-Erk1/2 | posi | 37   | 7      | 0.105   | 13   | 30  | 0.801   | 6             | 14  | 10  | 0.314   | 30         | 10   | 0.01    | 31    | 6      | 0.599   |
|          | nega | 141  | 54     |         | 66   | 139 |         | 17            | 54  | 64  |         | 89         | 80   |         | 128   | 32     |         |

\*: Fisher's exact test (the others were judged by Chi-square test)

\*\*:"Wel", "Mod", "Por" in Tumor Grade show well differentiated, moderately differentiated, and poorly differentiated, respectively.

| antibody | antibody | Spearman<br>coefficients (r) | p value |
|----------|----------|------------------------------|---------|
| p-eIF4E  | p-AKT    | 0.375                        | <0.001  |
|          | p-Erk1/2 | 0.053                        | 0.382   |
|          | p-TSC2   | 0.208                        | <0.001  |
|          | p-mTOR   | 0.121                        | 0.044   |
|          | p-S6     | 0.366                        | <0.001  |
| p-S6     | p-AKT    | 0.248                        | <0.001  |
|          | p-Erk1/2 | 0.36                         | <0.001  |
|          | p-TSC2   | 0.13                         | 0.033   |
|          | p-mTOR   | 0.156                        | 0.01    |
| p-mTOR   | p-AKT    | 0.041                        | 0.513   |
|          | p-Erk1/2 | 0.149                        | 0.014   |
|          | p-TSC2   | 0.107                        | 0.078   |
| p-TSC2   | p-AKT    | 0.202                        | 0.001   |
|          | p-Erk1/2 | 0.252                        | <0.001  |
| p-AKT    | p-Erk1/2 | 0.101                        | 0.101   |

|               | Case(n) | MST*(yrs) | 5-year survival rate (%) | Log-rank p vaule (Group X vs. the others) |
|---------------|---------|-----------|--------------------------|-------------------------------------------|
| Cluster Group | 254     | 3.4       | 38.1                     |                                           |
| Group 1       | 7       | 3.5       | 40                       | 0.332                                     |
| Group 2       | 15      | 5.3       | 55.6                     | 0.32                                      |
| Group 3       | 16      | 9.4       | 75                       | 0.019                                     |
| Group 4       | 8       | 2.6       | 33.3                     | 0.407                                     |
| Group 5       | 28      | 5.8       | 51                       | 0.069                                     |
| Group 6       | 38      | 2.7       | 28                       | 0.328                                     |
| Group 7       | 20      | 3.6       | 42.2                     | 0.315                                     |
| Group 8       | 13      | 3.5       | 27.3                     | 0.554                                     |
| Group 9       | 12      | 0.7       | 12                       | 0.006                                     |
| Group 10      | 13      | 2.2       | 0                        | 0.01                                      |
| Group 11      | 13      | 1.2       | 25                       | 0.04                                      |
| Group 12      | 12      | 2         | 36.4                     | 0.614                                     |
| Group 13      | 32      | 2.7       | 30.3                     | 0.558                                     |
| Group 14      | 6       | NA**      | 50                       | 0.664                                     |
| Group 15      | 21      | 2.4       | 38.9                     | 0.667                                     |

\*: MST(yrs):median survival time(years)

\*\* : NA: not available
